# Supplementary material for: Characterization of the naive murine antibody repertoire using unamplified high-throughput sequencing
Source: PubMed Central journal article supplement (PMC5761896; doi:10.1371/journal.pone.0190982), 2018-01-10
Supplement: pone.0190982.s001.pdf [file pone.0190982.s001.pdf]

A

|           | Pool 1 | Pool 2 | Pool 3 |
|-----------|--------|--------|--------|
| V1-80*01  | 7.83   | 7.00   | 3.34   |
| V1-26*01  | 4.29   | 3.96   | 3.86   |
| V6-3*01   | 2.91   | 2.74   | 4.93   |
| V1-53*01  | 3.80   | 2.96   | 2.73   |
| V1-55*01  | 3.57   | 2.40   | 3.34   |
| V3-6*01   | 2.68   | 2.28   | 3.81   |
| V1-9*01   | 3.00   | 3.54   | 1.85   |
| V1-18*01  | 4.05   | 3.09   | 1.21   |
| V9-3*01   | 2.46   | 2.72   | 2.46   |
| V1-50*01  | 1.43   | 2.32   | 3.89   |
| V1-64*01  | 1.88   | 2.08   | 3.64   |
| V6-6*01   | 2.72   | 2.22   | 1.51   |
| V1-82*01  | 2.06   | 1.97   | 1.96   |
| V8-8*01   | 2.22   | 1.74   | 1.94   |
| V1-78*01  | 2.66   | 1.17   | 1.51   |
| V1-81*01  | 1.76   | 1.77   | 1.24   |
| V7-3*01   | 1.68   | 1.64   | 1.45   |
| V1-72*01  | 1.32   | 1.41   | 1.90   |
| V10-1*01  | 1.62   | 1.62   | 1.37   |
| V1-22*01  | 1.50   | 1.77   | 1.24   |
| V5-17*01  | 1.38   | 1.75   | 1.37   |
| V2-2*01   | 1.16   | 1.75   | 1.40   |
| V14-4*01  | 1.50   | 1.30   | 1.43   |
| V1-76*01  | 0.87   | 2.22   | 1.11   |
| V2-3*01   | 1.54   | 1.40   | 1.24   |
| V4-1*01   | 1.09   | 2.05   | 1.02   |
| V1S92*01  | 1.43   | 0.99   | 1.49   |
| V11-2*01  | 1.59   | 1.39   | 0.86   |
| V1S95*01  | 1.35   | 0.97   | 1.50   |
| V1-69*01  | 0.86   | 1.40   | 1.40   |
| V1-39*01  | 1.04   | 0.85   | 1.36   |
| V1-52*01  | 0.77   | 0.98   | 1.46   |
| V1-15*01  | 1.05   | 0.96   | 1.06   |
| V10-3*01  | 0.78   | 1.47   | 0.80   |
| V2-9*01   | 1.39   | 0.82   | 0.83   |
| V1-75*01  | 1.30   | 0.72   | 0.89   |
| V2-9-1*01 | 0.93   | 0.78   | 1.13   |
| V1-19*01  | 0.74   | 1.07   | 1.01   |
| V14-2*01  | 1.03   | 0.99   | 0.80   |
| V8-12*01  | 1.03   | 1.00   | 0.78   |
| V1-66*01  | 0.35   | 0.47   | 1.92   |
| V1-59*01  | 0.91   | 0.53   | 1.20   |
| V5-4*01   | 0.99   | 0.91   | 0.65   |
| V5-16*01  | 0.89   | 0.83   | 0.74   |
| V1-7*01   | 0.80   | 0.88   | 0.76   |
| V1S108*01 | 0.13   | 0.74   | 1.57   |
| V5-9-1*02 | 0.31   | 0.30   | 1.74   |
| V1-74*01  | 0.45   | 0.62   | 1.18   |
| V2-6*01   | 0.02   | 1.98   | 0.24   |
| V2-6-8*01 | 0.02   | 1.98   | 0.23   |
| V9-1*01   | 0.43   | 0.79   | 0.93   |
| V1-63*01  | 1.69   | 0.23   | 0.17   |
| V1-42*01  | 0.77   | 0.44   | 0.80   |
| V9-4*01   | 1.06   | 0.52   | 0.41   |
| V1-61*01  | 0.44   | 0.60   | 0.87   |
| V3-1*01   | 0.92   | 0.44   | 0.51   |
| V1-54*01  | 0.82   | 0.47   | 0.59   |
| V14-3*01  | 0.60   | 0.58   | 0.68   |
| V1-4*01   | 0.56   | 0.68   | 0.43   |
| V2-5*01   | 0.39   | 0.67   | 0.54   |
| V3-8*01   | 0.45   | 0.67   | 0.41   |
| V1-12*01  | 0.54   | 0.62   | 0.34   |
| V1-85*01  | 0.67   | 0.30   | 0.45   |

|            | Pool 1 | Pool 2 | Pool 3 |
|------------|--------|--------|--------|
| V5-6*01    | 0.39   | 0.37   | 0.54   |
| V1-5*01    | 0.25   | 0.51   | 0.41   |
| V1-84*01   | 0.50   | 0.26   | 0.41   |
| V8-5*01    | 0.43   | 0.32   | 0.39   |
| V13-2*01   | 0.59   | 0.24   | 0.30   |
| V14-1*01   | 0.32   | 0.52   | 0.28   |
| V9-2*01    | 0.14   | 0.32   | 0.56   |
| V5S21*01   | 0.07   | 0.11   | 0.70   |
| V1-47*01   | 0.34   | 0.28   | 0.25   |
| V1-58*01   | 0.35   | 0.29   | 0.21   |
| V1-34*01   | 0.30   | 0.22   | 0.31   |
| V3-5*01    | 0.27   | 0.33   | 0.21   |
| V2-4*01    | 0.27   | 0.39   | 0.15   |
| V1-20*01   | 0.19   | 0.31   | 0.24   |
| V12-3*01   | 0.30   | 0.25   | 0.16   |
| V5-12*01   | 0.17   | 0.17   | 0.32   |
| V1-77*01   | 0.20   | 0.19   | 0.19   |
| V1S96*01   | 0.01   | 0.18   | 0.36   |
| V1-62-2*01 | 0.13   | 0.10   | 0.32   |
| V1-71*01   | 0.13   | 0.10   | 0.32   |
| V5-9*01    | 0.23   | 0.17   | 0.14   |
| V1-36*01   | 0.16   | 0.23   | 0.15   |
| V1-11*01   | 0.11   | 0.23   | 0.08   |
| V1-62-3*01 | 0.02   | 0.02   | 0.39   |
| V5-15*01   | 0.07   | 0.23   | 0.08   |
| V5-2*01    | 0.15   | 0.12   | 0.10   |
| V8-2*01    | 0.09   | 0.14   | 0.12   |
| V1S5*01    | 0.00   | 0.04   | 0.29   |
| V8S9*01    | 0.04   | 0.13   | 0.15   |
| V1-67*01   | 0.07   | 0.14   | 0.10   |
| V7-4*01    | 0.18   | 0.07   | 0.06   |
| V3-4*01    | 0.14   | 0.08   | 0.08   |
| V1S87*01   | 0.00   | 0.11   | 0.17   |
| V1S103*01  | 0.00   | 0.06   | 0.21   |
| V1S65*01   | 0.06   | 0.07   | 0.13   |
| V15-2*01   | 0.07   | 0.07   | 0.10   |
| V1-49*01   | 0.05   | 0.09   | 0.11   |
| V1-31*01   | 0.08   | 0.07   | 0.08   |
| V1-56*01   | 0.03   | 0.04   | 0.16   |
| V1S107*01  | 0.04   | 0.07   | 0.10   |
| V11-1*01   | 0.01   | 0.12   | 0.05   |
| V3-3*01    | 0.09   | 0.07   | 0.03   |
| V1S100*01  | 0.02   | 0.04   | 0.10   |
| V1-43*01   | 0.04   | 0.05   | 0.06   |
| V1-23*01   | 0.05   | 0.04   | 0.06   |
| V8-11*01   | 0.01   | 0.05   | 0.08   |
| V2-7*01    | 0.04   | 0.06   | 0.04   |
| V1-37*01   | 0.06   | 0.04   | 0.03   |
| V16-1*01   | 0.03   | 0.05   | 0.05   |
| V6-7*01    | 0.04   | 0.02   | 0.05   |
| V1S67*01   | 0.01   | 0.03   | 0.07   |
| V1S68*01   | 0.01   | 0.03   | 0.06   |
| V7-2*01    | 0.03   | 0.04   | 0.03   |
| V3S7*01    | 0.01   | 0.03   | 0.04   |
| V8-6*01    | 0.00   | 0.02   | 0.05   |
| V8-4*01    | 0.02   | 0.03   | 0.02   |
| V6-4*01    | 0.01   | 0.02   | 0.03   |
| V8-9*01    | 0.02   | 0.01   | 0.02   |
| V1-62-1*01 | 0.00   | 0.01   | 0.04   |
| V1-14*01   | 0.01   | 0.02   | 0.02   |
| V8-8-1*01  | 0.01   | 0.02   | 0.02   |
| V5-12-4*01 | 0.01   | 0.01   | 0.02   |
| V8-13*01   | 0.00   | 0.00   | 0.04   |

|            | Pool 1 | Pool 2 | Pool 3 |
|------------|--------|--------|--------|
| V5-9*04    | 0.00   | 0.01   | 0.02   |
| V6-5*01    | 0.01   | 0.01   | 0.01   |
| V13-1*01   | 0.01   | 0.01   | 0.01   |
| V1-17-1*01 | 0.01   | 0.01   | 0.00   |
| V5S24*01   | 0.01   | 0.01   | 0.00   |
| V1-24*01   | 0.00   | 0.00   | 0.00   |

**B**

|            | Pool 1 | Pool 2 | Pool 3 |
|------------|--------|--------|--------|
| V1-110*01  | 4.80   | 13.44  | 6.15   |
| V1-117*01  | 8.13   | 5.30   | 7.09   |
| V5-39*01   | 10.33  | 1.03   | 2.84   |
| V10-96*01  | 2.69   | 5.04   | 4.77   |
| V4-55*01   | 4.20   | 3.87   | 3.62   |
| V1-135*01  | 3.62   | 2.50   | 5.33   |
| V3-4*01    | 3.40   | 2.11   | 2.71   |
| V5-43*01   | 3.25   | 1.71   | 1.53   |
| V10-94*01  | 0.97   | 3.45   | 2.04   |
| V6-15*01   | 1.50   | 1.84   | 3.00   |
| V14-111*01 | 2.02   | 2.28   | 1.97   |
| V12-44*01  | 1.67   | 3.09   | 1.41   |
| V3-2*01    | 2.24   | 1.23   | 2.69   |
| V19-93*01  | 2.17   | 2.36   | 1.63   |
| V2-137*01  | 1.99   | 1.44   | 2.50   |
| V12-46*01  | 2.22   | 2.33   | 1.35   |
| V8-30*01   | 1.60   | 1.85   | 2.40   |
| V4-59*01   | 1.92   | 1.59   | 1.98   |
| V8-24*01   | 2.25   | 1.57   | 1.35   |
| V9-120*01  | 1.76   | 1.58   | 1.70   |
| V4-72*01   | 2.05   | 1.08   | 1.21   |
| V6-23*01   | 1.04   | 1.68   | 1.59   |
| V6-17*01   | 1.44   | 1.55   | 1.28   |
| V14-126*01 | 1.63   | 1.38   | 1.22   |
| V4-70*01   | 0.65   | 1.12   | 2.37   |
| V15-103*01 | 1.02   | 1.87   | 1.23   |
| V8-27*01   | 1.39   | 1.33   | 1.09   |
| V4-57*01   | 2.20   | 0.65   | 0.78   |
| V5-48*01   | 1.10   | 0.92   | 1.21   |
| V16-104*01 | 1.02   | 0.96   | 1.15   |
| V2-109*01  | 0.99   | 0.94   | 0.90   |
| V17-127*01 | 1.06   | 0.82   | 0.92   |
| V6-32*01   | 0.72   | 1.06   | 0.92   |
| V4-53*01   | 1.01   | 1.02   | 0.63   |
| V8-21*01   | 0.38   | 0.61   | 1.66   |
| V8-19*01   | 0.86   | 0.92   | 0.81   |
| V6-25*01   | 0.73   | 0.63   | 1.23   |
| V17-121*01 | 0.97   | 0.68   | 0.80   |
| V4-68*01   | 0.58   | 1.04   | 0.82   |
| V9-124*01  | 0.83   | 0.95   | 0.62   |
| V4-86*01   | 0.53   | 1.07   | 0.80   |
| V12-89*01  | 0.96   | 0.65   | 0.75   |
| V12-41*01  | 0.66   | 0.58   | 1.06   |
| V4-91*01   | 0.68   | 0.58   | 0.78   |
| V3-5*01    | 0.65   | 0.54   | 0.80   |
| V4-63*01   | 0.45   | 1.30   | 0.22   |
| V3-12*01   | 0.41   | 0.78   | 0.74   |
| V3-10*01   | 0.54   | 0.55   | 0.81   |
| V2-112*01  | 0.40   | 1.05   | 0.40   |
| V8-28*01   | 0.68   | 0.49   | 0.51   |
| V6-20*01   | 0.53   | 0.72   | 0.38   |
| V4-57-1*01 | 0.41   | 0.57   | 0.54   |
| V14-100*01 | 0.54   | 0.51   | 0.46   |
| V6-13*01   | 0.30   | 0.26   | 0.81   |
| V1-122*01  | 0.51   | 0.32   | 0.50   |
| V5-45*01   | 0.60   | 0.31   | 0.39   |
| V3-7*01    | 0.27   | 0.55   | 0.38   |
| V4-61*01   | 0.61   | 0.29   | 0.31   |
| V13-85*01  | 0.28   | 0.36   | 0.50   |
| V8-16*01   | 0.28   | 0.49   | 0.32   |
| V1-99*01   | 0.61   | 0.22   | 0.25   |
| V4-79*01   | 0.20   | 0.23   | 0.64   |
| V13-84*01  | 0.29   | 0.41   | 0.36   |

|              | Pool 1 | Pool 2 | Pool 3 |
|--------------|--------|--------|--------|
| V12-98*01    | 0.23   | 0.47   | 0.29   |
| V4-71*01     | 0.03   | 0.39   | 0.55   |
| V4-74*01     | 0.34   | 0.33   | 0.28   |
| V4-80*01     | 0.23   | 0.32   | 0.36   |
| V6-14*01     | 0.38   | 0.22   | 0.29   |
| V4-50*01     | 0.32   | 0.26   | 0.30   |
| V1-88*01     | 0.26   | 0.35   | 0.25   |
| V7-33*01     | 0.09   | 0.25   | 0.28   |
| V4-73*01     | 0.03   | 0.28   | 0.31   |
| V11-125*01   | 0.10   | 0.23   | 0.26   |
| V6-32*02     | 0.11   | 0.27   | 0.20   |
| V4-58*01     | 0.15   | 0.19   | 0.21   |
| V1-133*01    | 0.14   | 0.12   | 0.26   |
| V4-69*01     | 0.11   | 0.14   | 0.27   |
| V10-95*01    | 0.12   | 0.17   | 0.16   |
| V9-129*01    | 0.11   | 0.20   | 0.14   |
| V4-78*01     | 0.05   | 0.21   | 0.18   |
| V3-1*01      | 0.09   | 0.17   | 0.18   |
| V8-18*01     | 0.09   | 0.07   | 0.22   |
| V12-38*01    | 0.11   | 0.10   | 0.15   |
| V4-90*01     | 0.14   | 0.10   | 0.09   |
| V8-23-1*01   | 0.08   | 0.13   | 0.10   |
| V4-62*01     | 0.04   | 0.12   | 0.14   |
| V8-34*01     | 0.05   | 0.12   | 0.12   |
| V12-e*01     | 0.02   | 0.14   | 0.12   |
| V4-81*01     | 0.09   | 0.11   | 0.08   |
| V9-123*01    | 0.10   | 0.08   | 0.09   |
| V14-130*01   | 0.08   | 0.08   | 0.07   |
| V3-3*01      | 0.05   | 0.07   | 0.08   |
| V4-51*01     | 0.06   | 0.07   | 0.06   |
| V3-9*01      | 0.02   | 0.06   | 0.09   |
| V1-131*01    | 0.01   | 0.06   | 0.10   |
| V2-a*01      | 0.02   | 0.08   | 0.07   |
| V4-52*01     | 0.03   | 0.05   | 0.08   |
| V4-54*01     | 0.03   | 0.05   | 0.08   |
| V4-92*01     | 0.07   | 0.05   | 0.04   |
| V6-29*01     | 0.04   | 0.07   | 0.03   |
| V1-132*01    | 0.05   | 0.03   | 0.06   |
| V5-37*01     | 0.02   | 0.05   | 0.05   |
| V18-36*01    | 0.04   | 0.04   | 0.03   |
| V8-26*01     | 0.01   | 0.03   | 0.03   |
| V20-101-2*01 | 0.01   | 0.01   | 0.02   |
| V6-c*01      | 0.00   | 0.02   | 0.01   |
| V6-d*01      | 0.01   | 0.01   | 0.00   |
| V1-35*01     | 0.00   | 0.01   | 0.01   |
| V6-b*01      | 0.00   | 0.01   | 0.01   |
