# Supplementary material for: Characterization of the naive murine antibody repertoire using unamplified high-throughput sequencing
Source: PubMed Central journal article supplement (PMC5761896; doi:10.1371/journal.pone.0190982), 2018-01-10
Supplement: pone.0190982.s003.pdf [file pone.0190982.s003.pdf]

A

|                  | Pool 1 | Pool 2 | Pool 3 |
|------------------|--------|--------|--------|
| CARGAYW          | 1      | 2      | 3      |
| CARDYYGSSWYFDVW  | 18     | 6      | 6      |
| CMRYSNYWYFDVW    | 4      | 11     | 15     |
| CARGGYW          | 16     | 5      | 18     |
| CARGTYW          | 45     | 18     | 7      |
| CMRYGNYWYFDVW    | 37     | 15     | 23     |
| CARGYYFDYW       | 45     | 9      | 22     |
| CARGDYW          | 9      | 26     | 45     |
| CARDSNWYFDVW     | 39     | 34     | 19     |
| CARGPYW          | 13     | 158    | 34     |
| CARDNWDWYFDVW    | 189    | 20     | 55     |
| CMRYSSYWYFDVW    | 189    | 14     | 62     |
| CARW             | 125    | 73     | 170    |
| CARGGFAYW        | 97     | 158    | 137    |
| CAKKGYAMDYW      | 97     | 79     | 299    |
| CARDYYGSSYWYFDVW | 266    | 192    | 55     |
| CARLDYW          | 189    | 228    | 170    |
| CMRYGSSYWYFDVW   | 266    | 26     | 299    |
| CTTVRYW          | 125    | 301    | 170    |
| CARPYDYW         | 28     | 301    | 299    |
| CAQMRGFAYW       | 125    | 464    | 40     |
| CARRFDYW         | 413    | 228    | 96     |
| CMRYGSSWYFDVW    | 125    | 192    | 449    |
| CARDDGYWYFDVW    | 189    | 301    | 299    |
| CARRYYGSSYWYFDVW | 125    | 464    | 219    |
| CTTLRYW          | 266    | 112    | 449    |
| CAKNWDYW         | 189    | 464    | 219    |
| CARDYDYWYFDVW    | 413    | 192    | 299    |
| CARRDYGSSYWYFDVW | 24     | 918    | 52     |
| CARYGPYYFDYW     | 62     | 31     | 933    |
| CARIYYGSSYWYFDVW | 266    | 464    | 299    |
| CARDEWFAYW       | 760    | 79     | 299    |
| CARHYYGSSYWYFDVW | 760    | 84     | 299    |
| CARDWDYWYFDVW    | 266    | 464    | 449    |
| CARGDGFYW        | 97     | 192    | 933    |
| CARHYGSSYWYFDVW  | 266    | 63     | 933    |
| CARGYYW          | 760    | 57     | 449    |
| CAKGDYGSSWFAYW   | 266    | 130    | 933    |
| CARLYYGSSYWYFDVW | 97     | 301    | 933    |
| CTRGYYFDYW       | 760    | 158    | 449    |
| CARGDGYFDYW      | 760    | 464    | 219    |
| CARGGDYW         | 760    | 464    | 219    |
| CARGAMDYW        | 189    | 464    | 933    |
| CARYDGYFDYW      | 413    | 301    | 933    |
| CTVYYGSTWFAYW    | 413    | 301    | 933    |
| CARRDYW          | 760    | 464    | 449    |
| CARSYYFDYW       | 760    | 464    | 449    |
| CAREGDYDYDWYFDVW | 760    | 918    | 52     |
| CARDYYGSSGYFDVW  | 17     | 918    | 933    |
| CTRVAYW          | 760    | 192    | 933    |
| CTRWDYW          | 760    | 192    | 933    |
| CARYAMDYW        | 760    | 228    | 933    |
| CARDYYGSSFDYW    | 760    | 918    | 299    |
| CARYSNYFDYW      | 760    | 918    | 299    |
| CANYGSSYWYFDVW   | 760    | 301    | 933    |
| CARSLDYW         | 760    | 301    | 933    |
| CASELGGFAYW      | 760    | 301    | 933    |
| CASPNDWYFDVW     | 760    | 301    | 933    |
| CAREDYW          | 189    | 918    | 933    |
| CARDGFAYW        | 266    | 918    | 933    |
| CARKLDYW         | 760    | 464    | 933    |
| CARNWDYAMDYW     | 760    | 464    | 933    |
| CARYYYGSSYWYFDVW | 760    | 464    | 933    |

|                  | Pool 1 | Pool 2 | Pool 3 |
|------------------|--------|--------|--------|
| CARSYYFDYW       | 760    | 464    | 449    |
| CAREGDYDYDWYFDVW | 760    | 918    | 52     |
| CARDYYGSSGYFDVW  | 17     | 918    | 933    |
| CTRVAYW          | 760    | 192    | 933    |
| CTRWDYW          | 760    | 192    | 933    |
| CARYAMDYW        | 760    | 192    | 933    |
| CARDYYGSSFDYW    | 760    | 918    | 299    |
| CARYSNYFDYW      | 760    | 918    | 299    |
| CANYGSSYWYFDVW   | 760    | 301    | 933    |
| CARSLDYW         | 760    | 301    | 933    |
| CASELGGFAYW      | 760    | 301    | 933    |
| CASPNDWYFDVW     | 760    | 301    | 933    |
| CAREDYW          | 189    | 918    | 933    |
| CARDGFAYW        | 266    | 918    | 933    |
| CARKLDYW         | 760    | 464    | 933    |
| CARNWDYAMDYW     | 760    | 464    | 933    |
| CARYYYGSSYWYFDVW | 760    | 464    | 933    |
| CARSGTDYW        | 413    | 918    | 933    |
| CARDFYW          | 760    | 918    | 933    |
| CARDGSSYWYFDVW   | 760    | 918    | 933    |
| CARDYFDYW        | 760    | 918    | 933    |
| CARESNYFDYW      | 760    | 918    | 933    |
| CARRDWYFDVW      | 760    | 918    | 933    |
| CARSYYAMDYW      | 760    | 918    | 933    |
| CARYGNYAMDYW     | 760    | 918    | 933    |
| CARYSNYAMDYW     | 760    | 918    | 933    |
| CATGFAYW         | 760    | 918    | 933    |
| CTGLYYFDYW       | 760    | 918    | 933    |
| CTYYYGSSDFYW     | 760    | 918    | 933    |

B

|              | Pool 1 | Pool 2 | Pool 3 |
|--------------|--------|--------|--------|
| CQQWSSYPPLTF | 13     | 6      | 2      |
| CQQWSSNPPTF  | 2      | 18     | 7      |
| CQQWSSYPETF  | 6      | 3      | 24     |
| CQQHYSTPLTF  | 7      | 12     | 16     |
| CQQGNTLPWTF  | 21     | 7      | 12     |
| CQQSNEDPRTF  | 11     | 21     | 10     |
| CFQGSHPWTF   | 17     | 12     | 18     |
| CFQGSHPYTF   | 16     | 9      | 22     |
| CQQHYSTPYTF  | 24     | 14     | 13     |
| CQQYSSYPLTF  | 26     | 15     | 11     |
| CQQYNSYPLTF  | 33     | 15     | 5      |
| CQQSNSWPPLTF | 20     | 26     | 8      |
| CQNGHSFPPLTF | 1      | 55     | 1      |
| CQQSNEDPYTF  | 14     | 25     | 25     |
| CLQHGESPYTF  | 19     | 17     | 29     |
| CLQYDEFPYTF  | 37     | 10     | 20     |
| CSQSTHVPYTF  | 24     | 23     | 21     |
| CLQYASSPYTF  | 21     | 24     | 26     |
| CFQGSHPPLTF  | 5      | 30     | 38     |
| CLQYDNLWTF   | 18     | 18     | 37     |
| CSQSTHVPWTF  | 23     | 20     | 31     |
| CQQYNSYPYTF  | 45     | 22     | 16     |
| CMQHLEYPYTF  | 43     | 40     | 9      |
| CQQWSSNPPLTF | 39     | 26     | 28     |
| CQQHYSTPWTF  | 35     | 33     | 32     |
| CQQSNSWPYTF  | 29     | 46     | 27     |
| CQQWSSYPPTF  | 28     | 40     | 34     |
| CQQGNTLPYTF  | 27     | 34     | 42     |
| CQQSNSWPPTF  | 3      | 89     | 30     |
| CQQWNYPLITF  | 94     | 8      | 22     |
| CMQHLEYPPTF  | 30     | 43     | 59     |
| CQQYKLPWTF   | 82     | 4      | 52     |
| CLQYDNLTYF   | 69     | 38     | 33     |
| CQQGNTLPRTF  | 34     | 44     | 63     |
| CLQSDNMPPLTF | 45     | 53     | 44     |
| CSQSTHVPPLTF | 77     | 1      | 65     |
| CQQHYSTPRTF  | 71     | 34     | 39     |
| CQQSNEDPWTF  | 82     | 51     | 15     |
| CLQHGESPPTF  | 48     | 31     | 73     |
| CWQGTHTFPWTF | 77     | 40     | 35     |
| CQQSKEVPWTF  | 102    | 55     | 4      |
| CWQGTHTFPYTF | 52     | 71     | 39     |
| CWQGTHTFPRTF | 43     | 67     | 54     |
| CHQYLSSWTF   | 47     | 48     | 70     |
| CQHHYGTPTYF  | 60     | 53     | 53     |
| CQNGHSFPYTF  | 15     | 94     | 57     |
| CQQGQSYPLTF  | 87     | 38     | 41     |
| CQQWSSNPYTF  | 73     | 37     | 59     |
| CWQGTHTFPQTF | 58     | 64     | 48     |
| CQHHYGTPLTF  | 39     | 73     | 59     |
| CQQYSSYPWTF  | 56     | 103    | 14     |
| CFQGSHPPLTF  | 66     | 5      | 103    |
| CFQGSHPPTF   | 58     | 47     | 70     |
| CHQYLSSYTF   | 35     | 62     | 78     |
| CQQHYSTPPTF  | 66     | 61     | 48     |
| CLQYASSPWTF  | 52     | 59     | 65     |
| CQNDYSYPLTF  | 52     | 73     | 54     |
| CQQWSSNPPTF  | 50     | 55     | 77     |
| CQHFHWGTPYTF | 48     | 70     | 68     |
| CQQGQSYPWTF  | 73     | 32     | 83     |
| CQQYSGYPLTF  | 97     | 48     | 45     |
| CQQSKEVPRTF  | 7      | 51     | 138    |
| CMQHLEYPPLTF | 52     | 72     | 74     |

|               | Pool 1 | Pool 2 | Pool 3 |
|---------------|--------|--------|--------|
| CQQSNEDPPTF   | 30     | 120    | 48     |
| CLQSDNMPYTF   | 60     | 76     | 69     |
| CQHFHWGTPWTF  | 41     | 69     | 97     |
| CQQRSSYPPLTF  | 69     | 96     | 42     |
| CQQWSSYPYTF   | 38     | 45     | 124    |
| CFQGSHPVPTF   | 30     | 82     | 97     |
| CLQSDNLPPLTF  | 68     | 79     | 63     |
| CSQSTHVPPTF   | 60     | 96     | 67     |
| CQQGNTLPPTF   | 87     | 36     | 103    |
| CQHFHWGTPLTF  | 122    | 10     | 100    |
| CAQNLELPWTF   | 91     | 50     | 93     |
| CQQHNEYPWTF   | 64     | 86     | 89     |
| CQHHYGTPTF    | 94     | 2      | 144    |
| CLQYASYPRTF   | 50     | 78     | 122    |
| CQQHNEYPPLTF  | 84     | 76     | 93     |
| CQQYSSYPYTF   | 97     | 101    | 62     |
| CQQYNSYPPTF   | 131    | 91     | 46     |
| CQQYSSYPLTF   | 56     | 93     | 130    |
| CLQSDNLPYTF   | 97     | 103    | 80     |
| CLQYDEFPLTF   | 106    | 82     | 93     |
| CQQYSSYPYTF   | 128    | 73     | 80     |
| CQQHNEYPYTF   | 110    | 87     | 85     |
| CQQYKLPYTF    | 108    | 100    | 74     |
| CFQGSHPPTF    | 102    | 103    | 78     |
| CQQDYSSPYTF   | 136    | 67     | 80     |
| CQQRSSYPPTF   | 12     | 143    | 130    |
| CLQYASSPPTF   | 87     | 91     | 112    |
| CQNGHSFPPTF   | 10     | 198    | 90     |
| CSQSTHVPPTF   | 91     | 110    | 97     |
| CQQSKEVPYTF   | 84     | 112    | 103    |
| CQQSNEDPLTF   | 102    | 131    | 70     |
| CHORSSWTF     | 175    | 126    | 3      |
| CQQSNSWPHTF   | 117    | 64     | 124    |
| CLQYASSPLTF   | 128    | 103    | 83     |
| CQQSNSWPPTF   | 122    | 111    | 85     |
| CWQGTHTFPPTF  | 150    | 58     | 113    |
| CGQSYSSPYTF   | 106    | 120    | 103    |
| CHQYLSSRTF    | 94     | 112    | 130    |
| CQQHYSTPPTF   | 122    | 123    | 92     |
| CQQGQSYPYTF   | 144    | 63     | 138    |
| CQHFHWGTPRTF  | 79     | 138    | 130    |
| CQHHYGTPTWTF  | 117    | 131    | 100    |
| CWQGTHTFPHTF  | 91     | 138    | 122    |
| CQNDHSYPYTF   | 73     | 163    | 117    |
| CSQSTHVPRTF   | 110    | 126    | 117    |
| CWQGTHTFPPLTF | 84     | 159    | 110    |
| CQQGSSIPLTF   | 128    | 112    | 116    |
| CQHFHWSTPWTF  | 112    | 188    | 57     |
| CQHHYGTPTTF   | 117    | 131    | 113    |
| CQQYWSTPYTF   | 144    | 129    | 88     |
| CQQYSSYPPTF   | 175    | 143    | 46     |
| CAQNLELPYTF   | 112    | 138    | 117    |
| CQNVLSTPYTF   | 64     | 143    | 160    |
| CQNDHSYPLTF   | 136    | 109    | 124    |
| CQQGSSIPTF    | 97     | 191    | 93     |
| CQQDYSSPLTF   | 144    | 108    | 130    |
| CQHFHWGTPPTF  | 102    | 89     | 196    |
| CVQYAQFPYTF   | 131    | 112    | 144    |
| CQHFHWGTPPTF  | 117    | 96     | 182    |
| CQNGHSFPRTF   | 4      | 224    | 167    |
| CHQYLSSLTF    | 158    | 131    | 107    |
| CQHSRELPLTF   | 225    | 87     | 85     |
| CQQDYSSPWTF   | 136    | 149    | 117    |

B

|              | Pool 1 | Pool 2 | Pool 3 |
|--------------|--------|--------|--------|
| CQQNNEPWF    | 136    | 138    | 128    |
| CQNVLSTPFTF  | 87     | 182    | 138    |
| CQNVLSTPWTF  | 153    | 149    | 107    |
| CLQYDEFPWTF  | 169    | 82     | 160    |
| CLQYDEFPTF   | 79     | 170    | 163    |
| CLQYDNLRTF   | 144    | 103    | 167    |
| CQHFWSPTPYTF | 131    | 182    | 102    |
| CQQLVEYPFTF  | 163    | 29     | 223    |
| CQQWSGYPFTF  | 136    | 129    | 150    |
| CQQSKEVPPTF  | 175    | 59     | 188    |
| CLQSDNMPFTF  | 136    | 151    | 138    |
| CQQWSSNPWF   | 122    | 198    | 111    |
| CQQNNEPFTF   | 188    | 198    | 51     |
| CQHSRELPTF   | 158    | 151    | 144    |
| CLQSDNLPFTF  | 153    | 166    | 138    |
| CQQHLHIPYTF  | 153    | 131    | 176    |
| CQNGHSFPWF   | 9      | 214    | 238    |
| CHQRSSYPWF   | 131    | 182    | 150    |
| CQQGNTLPLTF  | 122    | 147    | 196    |
| CLQYASYPYTF  | 158    | 159    | 150    |
| CAQFYSPLTF   | 214    | 124    | 130    |
| CQNGHSFPPTF  | 71     | 239    | 158    |
| CFQSNLYPYTF  | 73     | 179    | 223    |
| CQNDYSYPYTF  | 169    | 96     | 213    |
| CQHHYGTPTF   | 188    | 131    | 160    |
| CQQNNEPPTF   | 175    | 166    | 138    |
| CSQSTHVPPWF  | 188    | 163    | 128    |
| CQQSNEPPTF   | 150    | 159    | 171    |
| CQHFVTPRTF   | 158    | 217    | 107    |
| CQQRSSYPPTF  | 158    | 170    | 163    |
| CQQLVEYPYTF  | 243    | 119    | 130    |
| CAQNLELWTF   | 243    | 138    | 113    |
| CKQSYNLWTF   | 271    | 217    | 6      |
| CQQGSSIPFTF  | 169    | 170    | 155    |
| CLQHWNYPLTF  | 163    | 179    | 155    |
| CQQYWSTPLTF  | 203    | 170    | 124    |
| CGQSYSPYTF   | 214    | 170    | 117    |
| CLQYDNLFTF   | 108    | 198    | 196    |
| CQQNNEPRTF   | 153    | 126    | 223    |
| CLQYDNLTYTF  | 203    | 112    | 188    |
| CQQYHSYPLTF  | 41     | 224    | 238    |
| CQNDYSYPFTF  | 150    | 198    | 158    |
| CLQYDNLWTF   | 214    | 82     | 213    |
| CLQYASYPWTF  | 163    | 198    | 150    |
| CQQYSSPRTF   | 112    | 198    | 203    |
| CHQWSSYPLTF  | 243    | 239    | 36     |
| CQQYWSTPWTF  | 169    | 154    | 196    |
| CLQGTQPWF    | 175    | 143    | 203    |
| CLQVTHVPYTF  | 175    | 159    | 188    |
| CVQYQFPWF    | 188    | 163    | 176    |
| CLQYDNLFTF   | 79     | 214    | 238    |
| CQQLYSTPYTF  | 243    | 112    | 182    |
| CQQRSSYPYTF  | 188    | 191    | 163    |
| CSQSTHVPPYTF | 163    | 182    | 203    |
| CLQYASSPPTF  | 175    | 208    | 167    |
| CQHSWEIPLTF  | 243    | 95     | 213    |
| CLQYASSPRTF  | 188    | 182    | 182    |
| CHQRSSYTF    | 188    | 28     | 339    |
| CQQGNTLPFTF  | 188    | 188    | 182    |
| CQQHNEYPFTF  | 243    | 264    | 54     |
| CQHSWEIPYTF  | 225    | 166    | 182    |
| CQQSNSWPRTF  | 122    | 191    | 261    |
| CLQHGESPWTF  | 112    | 217    | 251    |

|              | Pool 1 | Pool 2 | Pool 3 |
|--------------|--------|--------|--------|
| CQFTSSPYTF   | 203    | 182    | 196    |
| CQQYSSPFTF   | 336    | 101    | 144    |
| CQQWSSNPPTF  | 203    | 217    | 171    |
| CQQYSKLPPTF  | 112    | 271    | 223    |
| CSQSTHVPTF   | 136    | 252    | 223    |
| CQQYSKLPRTF  | 304    | 239    | 74     |
| CQHSRELPTF   | 203    | 239    | 176    |
| CGQSYSPFTF   | 304    | 64     | 261    |
| CQHSRELPTF   | 304    | 124    | 203    |
| CQQGQSYPTF   | 243    | 112    | 278    |
| CQQDYSSPFTF  | 188    | 224    | 223    |
| CFQSNLYPLTF  | 188    | 252    | 203    |
| CLQYDNLRTF   | 203    | 224    | 223    |
| CQQLYSTPLTF  | 304    | 170    | 188    |
| CHQRSSYPYTF  | 188    | 252    | 223    |
| CHQWSSYPTF   | 243    | 170    | 261    |
| CQQYSSYPTF   | 214    | 285    | 176    |
| CQQYWSTPFTF  | 271    | 170    | 238    |
| CVQYQFPRTF   | 243    | 239    | 203    |
| CLQYDEFPTF   | 225    | 252    | 213    |
| CQQNNEPLTF   | 336    | 191    | 163    |
| CLQYASYPFTF  | 336    | 80     | 278    |
| CQQYSKLPFTF  | 243    | 191    | 261    |
| CKQSYNLTYTF  | 243    | 285    | 171    |
| CQQLVEYPLTF  | 225    | 198    | 278    |
| CKQSYNLFTF   | 271    | 120    | 312    |
| CQQSNSWPWF   | 271    | 214    | 223    |
| CAQNLELPTF   | 214    | 285    | 213    |
| CAQNLELPLTF  | 304    | 208    | 203    |
| CHQWSSYPYTF  | 225    | 321    | 171    |
| CQQLVEYPTF   | 188    | 321    | 213    |
| CQQLYSTPWTF  | 225    | 239    | 261    |
| CHQYHRSPLTF  | 175    | 239    | 312    |
| CQHSRELPTF   | 374    | 131    | 223    |
| CQQYSSPPTF   | 225    | 233    | 278    |
| CKQSYNLLTF   | 271    | 252    | 223    |
| CQQWSSNPRTF  | 442    | 80     | 238    |
| CQHFVTPRTF   | 188    | 239    | 339    |
| CQQGSSIPYTF  | 203    | 224    | 339    |
| CQQDYSSPPTF  | 225    | 264    | 278    |
| CLQYDNLFTF   | 336    | 154    | 278    |
| CQNVLSTPPTF  | 374    | 264    | 130    |
| CQHSWEIPWTF  | 225    | 285    | 261    |
| CLQYDEFPTF   | 243    | 217    | 339    |
| CQQWSSFPFTF  | 136    | 147    | 518    |
| CQFTSSPWTF   | 243    | 321    | 238    |
| CSQSTHVPPPTF | 304    | 208    | 290    |
| CQQRKVPWTF   | 336    | 208    | 261    |
| CQQYSSYPWTF  | 225    | 208    | 373    |
| CLQHWNYPTF   | 117    | 387    | 312    |
| CQQYSKLPFTF  | 271    | 233    | 312    |
| CQQYSGYPYTF  | 243    | 285    | 290    |
| CQQSYSAPLTF  | 304    | 264    | 251    |
| CLQYDEFPPYTF | 163    | 321    | 339    |
| CQQYHSYPTF   | 271    | 321    | 238    |
| CHQWSSYPTF   | 304    | 271    | 261    |
| CQQYWSTPPTF  | 304    | 271    | 261    |
| CQNVLSTPRTF  | 175    | 239    | 425    |
| CFQSGYPFTF   | 271    | 233    | 339    |
| CHQWSSYPWTF  | 336    | 271    | 238    |
| CQHFVTPRTF   | 214    | 321    | 312    |
| CQQDYSSPRTF  | 225    | 285    | 339    |
| CSQSTHVPPPTF | 374    | 239    | 238    |

B

|              | Pool 1 | Pool 2 | Pool 3 |
|--------------|--------|--------|--------|
| CHQRSSYPFTF  | 203    | 427    | 223    |
| CQQYWSTPRTF  | 243    | 321    | 290    |
| CVQYAQFPLTF  | 271    | 271    | 312    |
| CQQYNSYPRTF  | 374    | 285    | 196    |
| CQNVLSTPLTF  | 271    | 252    | 339    |
| CKQAYDVPYTF  | 304    | 299    | 261    |
| CQQWSSFPYTF  | 203    | 154    | 518    |
| CQQYSSYPRTF  | 243    | 321    | 312    |
| CLQVTHVPLTF  | 131    | 472    | 278    |
| CHQYHRSPPTF  | 225    | 285    | 373    |
| CQQWNSYPLTF  | 271    | 472    | 144    |
| CSQSTHVWTF   | 336    | 299    | 261    |
| CQQGNTLRFTF  | 374    | 387    | 150    |
| CLQHSYLPYTF  | 304    | 357    | 251    |
| CQQWWSGYPYTF | 243    | 357    | 312    |
| CQQSKEVPFTF  | 574    | 321    | 19     |
| CHQYHRSPYTF  | 243    | 299    | 373    |
| CQNDHSYPFTF  | 336    | 357    | 223    |
| CHQYHRSPWTF  | 304    | 191    | 425    |
| CQQGNTLYTF   | 271    | 224    | 425    |
| CLQVTHVPWTF  | 336    | 299    | 290    |
| CQQWTYPLITF  | 336    | 217    | 373    |
| CQQYNSYPWTF  | 442    | 299    | 188    |
| CQHFWSWPFTF  | 271    | 321    | 339    |
| CHQRSSFTF    | 188    | 321    | 425    |
| CQQWSNYPYTF  | 442    | 154    | 339    |
| CQHFWSPLTF   | 336    | 387    | 213    |
| CVQYAQFPFTF  | 336    | 387    | 213    |
| CHQYHRSPFTF  | 214    | 299    | 425    |
| CHQWSSYRTF   | 374    | 239    | 339    |
| CQQWSSYPRTF  | 271    | 357    | 339    |
| CQQWSSYPWTF  | 336    | 321    | 312    |
| CALWYSNHLVF  | 304    | 357    | 312    |
| CQQWSSSPFTF  | 243    | 357    | 373    |
| CQQSKEVPLTF  | 442    | 357    | 176    |
| CFQGSHPVPTF  | 304    | 252    | 425    |
| CQQYSGYPFTF  | 304    | 387    | 290    |
| CLQRNAYPLTF  | 374    | 321    | 290    |
| CQQRSSYPWTF  | 442    | 299    | 251    |
| CQQSNSWPQYTF | 271    | 357    | 373    |
| CSQSTHVYTF   | 271    | 357    | 373    |
| CQQYSSSPLTF  | 374    | 208    | 425    |
| CLQHWNYPYTF  | 175    | 321    | 518    |
| CQQFTSSPSTF  | 203    | 472    | 339    |
| CAQNLELPFTF  | 442    | 387    | 188    |
| CQQNNEDPPTF  | 442    | 264    | 312    |
| CQQLYSTPRTF  | 442    | 299    | 278    |
| CQQGNTLWTF   | 574    | 271    | 176    |
| CQQSNSWPQTF  | 374    | 357    | 290    |
| CHQWSSYPFTF  | 175    | 427    | 425    |
| CLQHGESPLTF  | 442    | 357    | 238    |
| CQQYHSYPRTF  | 374    | 427    | 238    |
| CLQFYEFPLTF  | 374    | 299    | 373    |
| CLQYASYPLTF  | 442    | 321    | 290    |
| CQQSRKVPYTF  | 442    | 321    | 290    |
| CQQWWSGYPLTF | 442    | 299    | 312    |
| CLQGTHQPYTF  | 574    | 285    | 196    |
| CQQSNSWPPLTF | 304    | 387    | 373    |
| CQQYSGYPWTF  | 336    | 357    | 373    |
| CQQHYSTPTF   | 374    | 321    | 373    |
| CQQDYSSYTF   | 243    | 321    | 518    |
| CQQYNNYPLTF  | 574    | 271    | 238    |
| CQQFTSSPFTF  | 574    | 321    | 203    |

|              | Pool 1 | Pool 2 | Pool 3 |
|--------------|--------|--------|--------|
| CQQYSSYRTF   | 163    | 427    | 518    |
| CHOYLSLFTF   | 442    | 299    | 373    |
| CQQWSSYPITF  | 243    | 357    | 518    |
| CQHSRELPRTF  | 442    | 472    | 213    |
| CGQSYSPPFTF  | 225    | 387    | 518    |
| CAQNLELPPTF  | 574    | 321    | 238    |
| CQQWSSSPLTF  | 374    | 387    | 373    |
| CQHSWEIPPTF  | 574    | 252    | 312    |
| CHQRSSYPLTF  | 374    | 427    | 339    |
| CLQRNAYPYTF  | 243    | 472    | 425    |
| CLQGTHQPPTF  | 442    | 387    | 312    |
| CQQWSNYPPTF  | 225    | 233    | 684    |
| CQHSWEIPFTF  | 442    | 427    | 290    |
| CQHFWNTPYTF  | 442    | 472    | 251    |
| CFQGSHPVPTF  | 442    | 299    | 425    |
| CLQYDELYTF   | 243    | 561    | 373    |
| CQQSNSWPF    | 336    | 472    | 373    |
| CQQSNSWPQLTF | 336    | 472    | 373    |
| CQQYHSYPYTF  | 442    | 427    | 312    |
| CHQYLSSFTF   | 574    | 357    | 251    |
| CSQSTHVLTF   | 574    | 271    | 339    |
| CQQGQSYPRTF  | 442    | 321    | 425    |
| CQQYSSYLTF   | 442    | 387    | 373    |
| CHQRSSYPCTF  | 304    | 561    | 339    |
| CFQGSQYPYTF  | 374    | 151    | 684    |
| CVQGTHFPYTF  | 374    | 321    | 518    |
| CQQWSSYPITF  | 442    | 357    | 425    |
| CWQGTHFRFTF  | 442    | 357    | 425    |
| CQQWNYPYTF   | 271    | 271    | 684    |
| CALWYSNHWF   | 304    | 239    | 684    |
| CQHFWSPPPTF  | 336    | 387    | 518    |
| CQQRSSYPRTF  | 574    | 299    | 373    |
| CQQYHSYPWTF  | 169    | 561    | 518    |
| CQQWSSSPPTF  | 442    | 472    | 339    |
| CQQWNYPLYTF  | 442    | 387    | 425    |
| CQQSNSWLTF   | 271    | 472    | 518    |
| CGQSYSYPTF   | 574    | 321    | 373    |
| CAQLELPYTF   | 336    | 561    | 373    |
| CQQLYSTPFTF  | 374    | 472    | 425    |
| CLQGTHQPPTF  | 304    | 285    | 684    |
| CQQGNTLPPWTF | 304    | 285    | 684    |
| CLQFYEFYTF   | 374    | 387    | 518    |
| CQQWSSNPPYTF | 442    | 427    | 425    |
| CQQWSSNPPWTF | 574    | 357    | 373    |
| CFQSNYLPFTF  | 574    | 427    | 312    |
| CQQYNSYLTF   | 442    | 357    | 518    |
| CHQYLSSHTF   | 374    | 427    | 518    |
| CQQYNSYPLLTF | 574    | 387    | 373    |
| CQQWSSDPFTF  | 225    | 427    | 684    |
| CHQYLSYTF    | 442    | 472    | 425    |
| CQQHYSSPLTF  | 271    | 729    | 339    |
| CQQYSTYPYTF  | 574    | 427    | 339    |
| CQQYSSYYTF   | 442    | 387    | 518    |
| CQQYSSYPTF   | 442    | 387    | 518    |
| CLQVTHVPPTF  | 374    | 561    | 425    |
| CQQHLHIPWTF  | 271    | 729    | 373    |
| CVQGTHFPHTF  | 574    | 427    | 373    |
| CVQGTHFPRTF  | 442    | 561    | 373    |
| CKQSYNLPFTF  | 574    | 285    | 518    |
| CQNGHSFPF    | 225    | 729    | 425    |
| CQQYSGYPLITF | 304    | 561    | 518    |
| CLQVTHVPFTF  | 574    | 472    | 339    |
| CQQYSSYPLFTF | 574    | 472    | 339    |

**B**

|               | Pool 1 | Pool 2 | Pool 3 |
|---------------|--------|--------|--------|
| CQQYSSYLTf    | 574    | 387    | 425    |
| CQQWSTYPPTf   | 442    | 264    | 684    |
| CWQGTHFPf     | 336    | 387    | 684    |
| CQQWSSNPPMYTf | 304    | 427    | 684    |
| CHQRSSYPf     | 574    | 472    | 373    |
| CKQSYNLRTf    | 442    | 299    | 684    |
| CLQHSYLPLTf   | 574    | 427    | 425    |
| CAQNLELPTf    | 442    | 472    | 518    |
| CQQYSKLWTF    | 442    | 472    | 518    |
| CKQAYDVPLTf   | 374    | 387    | 684    |
| CHQYHRSPRTf   | 442    | 321    | 684    |
| CQQWSSDPYTF   | 574    | 198    | 684    |
| CSQSTHIPWTF   | 304    | 729    | 425    |
| CLQYDNLLPWTF  | 574    | 729    | 167    |
| CQHSWEIPRTf   | 574    | 472    | 425    |
| CQNDHSPWTF    | 574    | 561    | 339    |
| CVQGTHFPLTf   | 574    | 561    | 339    |
| CQQYNKLPWTF   | 442    | 357    | 684    |
| CQQGSSIPRTf   | 374    | 427    | 684    |
| CQQYNSYPHTf   | 336    | 729    | 425    |
| CQQRKVPSTf    | 574    | 561    | 373    |
| CLQYDNLLLTF   | 442    | 729    | 339    |
| CQQYYTYPWTF   | 442    | 561    | 518    |
| CQQYSSYRTf    | 374    | 729    | 425    |
| CFQGSHPF      | 374    | 472    | 684    |
| CLQYASSLTf    | 374    | 472    | 684    |
| CQQYTSYPLTf   | 574    | 285    | 684    |
| CQQHLHIPPTf   | 304    | 561    | 684    |
| CHQRSSYPf     | 442    | 427    | 684    |
| CSQSTHVPHTf   | 574    | 299    | 684    |
| CCQGSHPPLTf   | 574    | 561    | 425    |
| CQQFTSSPLTf   | 574    | 561    | 425    |
| CQQSYAPPTf    | 574    | 561    | 425    |
| CVQYAFPPPTf   | 574    | 561    | 425    |
| CHQWSSYHTf    | 574    | 472    | 518    |
| CLQYDSLWTF    | 574    | 472    | 518    |
| CQQGNTLPPLTf  | 574    | 472    | 518    |
| CQQWNYPLTf    | 574    | 321    | 684    |
| CWQGTHFPPTf   | 336    | 729    | 518    |
| CHQYHRSPPTf   | 442    | 729    | 425    |
| CQQRSSYPf     | 442    | 729    | 425    |
| CQQWNNYPLTf   | 442    | 729    | 425    |
| CSQSTHVPf     | 442    | 729    | 425    |
| CQQGSSSPYTF   | 442    | 472    | 684    |
| CQQWSSNPQYTF  | 442    | 472    | 684    |
| CQQYSSYPf     | 442    | 472    | 684    |
| CQQHYSTPf     | 574    | 729    | 312    |
| CQQYNSYPf     | 374    | 561    | 684    |
| CQNDYSPPTf    | 374    | 729    | 518    |
| CQQSNEDPPWTF  | 374    | 729    | 518    |
| CLQYDEFPf     | 214    | 729    | 684    |
| CQQWNYPPTf    | 225    | 729    | 684    |
| CFQGSHPSTf    | 574    | 561    | 518    |
| CLQYDNLTWTF   | 574    | 561    | 518    |
| CMQHLECPYTF   | 574    | 561    | 518    |
| CQQYNSYPLYTF  | 574    | 561    | 518    |
| CQQHYSTWTF    | 574    | 729    | 373    |
| CQQYNSYPLAF   | 574    | 729    | 373    |
| CQQYSGYPRTf   | 574    | 729    | 373    |
| CLQYASSPYMYTF | 442    | 561    | 684    |
| CQQWNSNPYTF   | 442    | 561    | 684    |
| CHQYLSSTf     | 574    | 729    | 425    |
| CLQYDNLLPTf   | 574    | 729    | 425    |

|              | Pool 1 | Pool 2 | Pool 3 |
|--------------|--------|--------|--------|
| CQQWSSYPLITf | 574    | 729    | 425    |
| CALWYSNHFVVf | 574    | 472    | 684    |
| CQQHLHIPPTf  | 574    | 472    | 684    |
| CSQSTHVPWTF  | 374    | 729    | 684    |
| CGQSYSPRTf   | 574    | 561    | 684    |
| CLQHGESPF    | 574    | 561    | 684    |
| CLOSDNMYTF   | 574    | 561    | 684    |
| CLQYDEFMYTF  | 574    | 561    | 684    |
| CQQWSSNPPWTF | 574    | 561    | 684    |
| CFQGSHPWTF   | 574    | 729    | 518    |
| CHQYLSSTf    | 574    | 729    | 518    |
| CLQYASSPTf   | 574    | 729    | 518    |
| CMQQLEYPYTF  | 574    | 729    | 518    |
| CQQRKEVPWTF  | 574    | 729    | 518    |
| CQQRSSYPPLTf | 574    | 729    | 518    |
| CQQYNSYTF    | 574    | 729    | 518    |
| CQQYSKLTWTF  | 574    | 729    | 518    |
| CFQSNYLPYTF  | 442    | 729    | 684    |
| CLQYDEFPLTf  | 442    | 729    | 684    |
| CQHHYGTWTF   | 442    | 729    | 684    |
| CQQYNTYPLTf  | 442    | 729    | 684    |
| CCQGSHPYTF   | 574    | 729    | 684    |
| CLHYDEFWTF   | 574    | 729    | 684    |
| CLQGTYPRTf   | 574    | 729    | 684    |
| CQNDHSPRTf   | 574    | 729    | 684    |
| CQQHLHIPPLTf | 574    | 729    | 684    |
| CQQHYSTPHTf  | 574    | 729    | 684    |
| CQQSIEDPYTF  | 574    | 729    | 684    |
| CQQSNEDRTf   | 574    | 729    | 684    |
| CQQSNSWPALTF | 574    | 729    | 684    |
| CQQSYEDPWTF  | 574    | 729    | 684    |
| CQQWSSPPITf  | 574    | 729    | 684    |
| CQQYWSTALTF  | 574    | 729    | 684    |
| CQQYWSTMYTF  | 574    | 729    | 684    |
